# Supplementary material for: Suppressed P2-Z phase transition and Fe migration in the Na layer of an Fe/Mn-based layered oxide cathode for advanced sodium-ion batteries
Source: Royal Society of Chemistry journal article supplement (doi:10.1039/d4tc04961f), 2025-01-01
Supplement: d4tc04961f1.pdf [file d4tc04961f1.pdf]

# Suppressed P2-Z phase transition and Fe-migration in Na layered of Fe/Mn-based layered oxide cathode for advanced sodium-ion batteries

Wei Zhao <sup>a, b, c</sup>, Shaohua Luo <sup>a, b, c \*</sup>, Lixiong Qian <sup>a, b, c \*</sup>, Rui Huang <sup>a, b, c</sup>, Ge Wang <sup>a, b, c</sup>, Haoran Zhang <sup>a, b, c</sup>, Guodong Hao <sup>a, b, c</sup>, Shengxun Yan <sup>a, b, c</sup>

*a School of Materials Science and Engineering, Northeastern University, Shenyang 110819, Liaoning, China*

*b School of Resources and Materials, Northeastern University at Qinhuangdao, Qinhuangdao 066004, Hebei China*

*c Hebei Key Laboratory of Dielectric and Electrolyte Functional Material, Northeastern University at Qinhuangdao, Qinhuangdao 066004, Hebei China*

\*Corresponding authors.

*E-mail addresses:* [tianyanglsh@163.com](mailto:tianyanglsh@163.com) (S.-H. Luo).

## Supplementary Figures and Tables

### Na-ion diffusion coefficient ( $D_{Na}$ ) calculation based on GITT results:

The Na-ion diffusion coefficient  $D_{Na}$  is calculated from the simplified equation:

$$D_{Na} = \frac{4}{\pi\tau} \left( \frac{m_B V_M}{M_B A} \right)^2 \left( \frac{\Delta E_S}{\Delta E_\tau} \right)^2$$
, where the  $\Delta E_\tau$  is the transient voltage change caused by applying a constant current  $i$  during a constant current pulse  $\tau$ ,  $\Delta E_S$  is the steady state voltage variation,  $\tau$  duration time of the current pulse,  $M_B$  is the molar mass ( $\text{g mol}^{-1}$ ),  $A$  is the total contact area of the electrode with the electrolyte,  $m_B$  is the mass of active material,  $V_M$  is the molar volume of electrode material ( $\text{cm}^3 \text{mol}^{-1}$ )<sup>1,2</sup>.

### Na-Ion Diffusion Coefficients Calculation Based on CV results:

The  $D_{Na}$  values can also be analysed by the following Randles-Sevcik equation:

$$i_p = 2.69 \times 10^5 n^{3/2} A D_{Na}^{1/2} C_{Na} v^{1/2}$$
, where  $i_p$  (A) is the peak current,  $A$  ( $\text{cm}^2$ ) is the direct contact area between electrode and electrolyte,  $C_{Na}$  is the Na-ion concentration in the electrode,  $v$  ( $\text{V s}^{-1}$ ) is the scan rate, and  $n$  is the number of transferred electrons. Figure 3c shows the linear relationship between the peak current ( $i_p$ ) and the scan rate ( $v^{1/2}$ ), Based on the linear relationships between  $i_p$  and  $v^{1/2}$  of the redox peaks (Figure 4d)<sup>3,4</sup>.

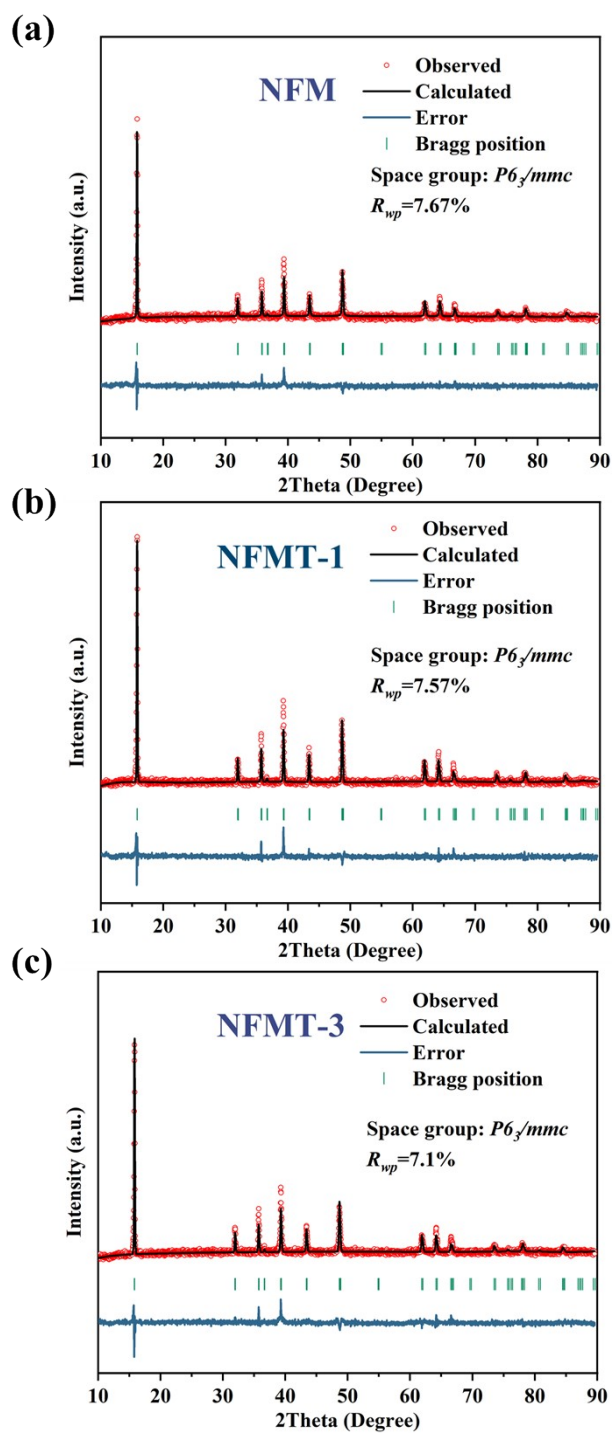

**Figure S1** Rietveld refinements of the XRD patterns for a) NFM, b) NFMT-1 and (c) NFMT-3 cathode materials.

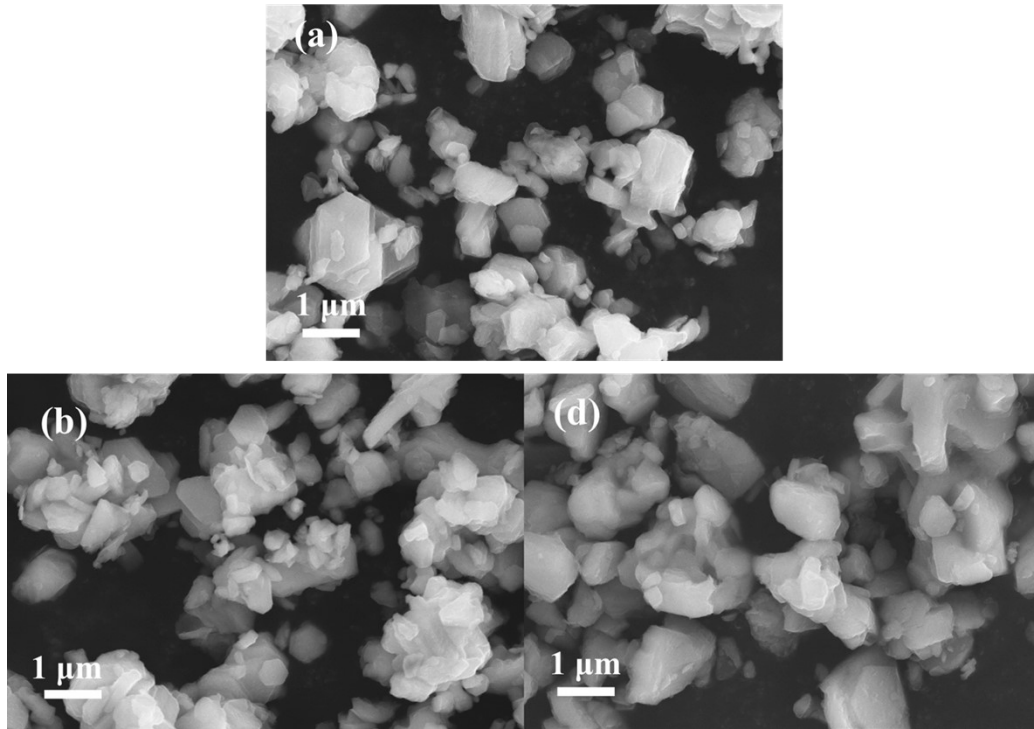

**Figure S2.** SEM images of (a) NFM, (b) NFMT-1, (c) NFMT-3.

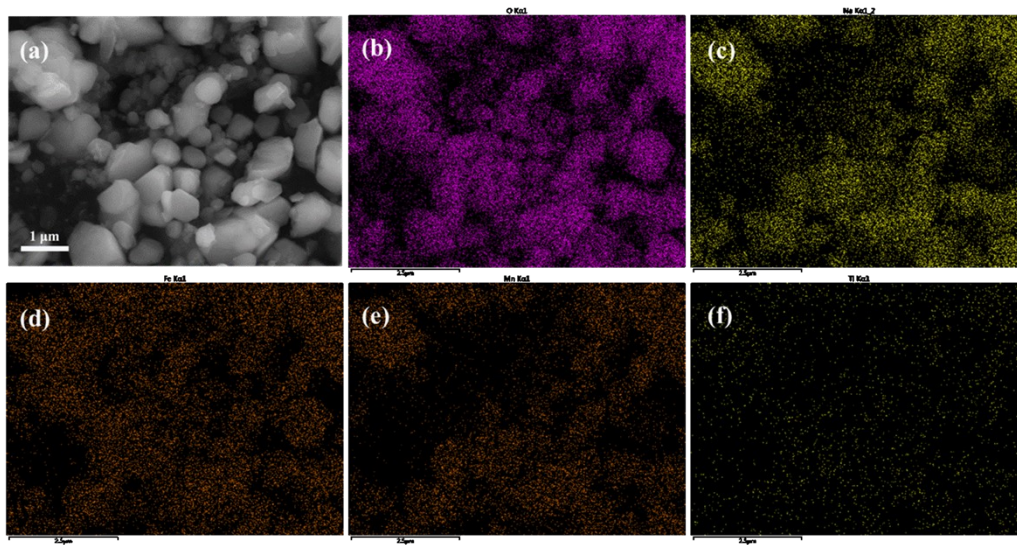

**Figure S3** SEM-EDS images of (a-f) NFMT-2.

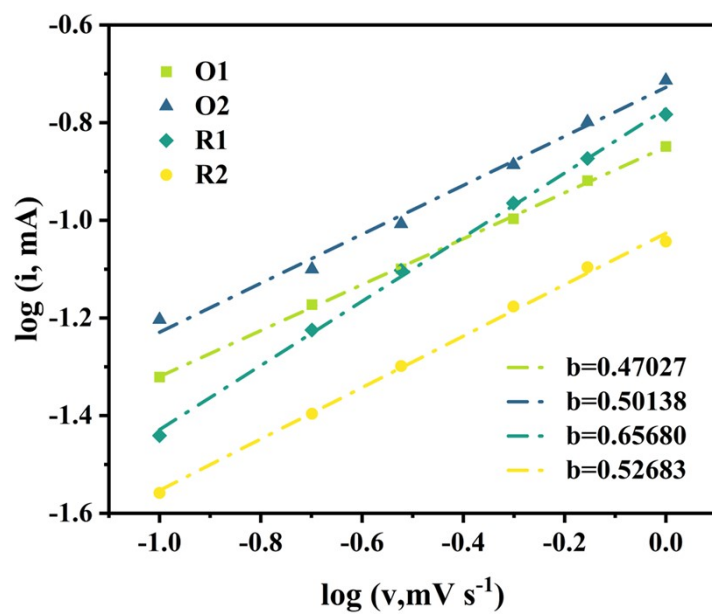

Figure S4. Linear relationships of  $\log i_p$  versus  $\log v$ .

**Table S1.** Detailed structural information of NFM, NFMT-1,2,3 determined from the Rietveld refined XRD pattern.

| <b>Samples</b>                   | <b>NFM</b>     | <b>MFMT-1</b>  | <b>MFMT-2</b>  | <b>MFMT-3</b>  |
|----------------------------------|----------------|----------------|----------------|----------------|
| <b>Lattice</b>                   | Hexagonal      | Hexagonal      | Hexagonal      | Hexagonal      |
| <b>Space group</b>               | <i>P63/mmc</i> | <i>P63/mmc</i> | <i>P63/mmc</i> | <i>P63/mmc</i> |
| <b><i>a=b</i> (Å)</b>            | 2.9321         | 2.9384         | 2.9403         | 2.9412         |
| <b><i>C</i> (Å)</b>              | 11.2043        | 11.2057        | 11.2081        | 11.2087        |
| <b><i>V</i> (Å<sup>3</sup>)</b>  | 83.3579        | 83.7898        | 83.91622       | 83.9721        |
| <b><i>R<sub>p</sub></i> (%)</b>  | 4.41           | 4.52           | 4.28           | 4.21           |
| <b><i>R<sub>wp</sub></i> (%)</b> | 7.67           | 7.57           | 6.92           | 7.10           |

**Table S2.** <sup>57</sup>Fe-Mössbauer spectroscopy parameters of NFM and NFMT-2 charged to 4.3 V.

| <b>Sample</b> | <b>IS/mm s<sup>-1</sup></b> | <b>QS/mm s<sup>-1</sup></b> | <b>FWHM/mm s<sup>-1</sup></b> | <b>Relative intensity</b> |
|---------------|-----------------------------|-----------------------------|-------------------------------|---------------------------|
| <b>NFMT-2</b> | 0.32622                     | 0.68388                     | 0.31703                       | (72.8%) Fe <sup>3+</sup>  |
|               | 0.42373                     | 0.73671                     | 0.31871                       | (27.42%) Fe <sup>4+</sup> |
| <b>NFM</b>    | 0.37776                     | 0.86196                     | 0.32486                       | (68.85%) Fe <sup>3+</sup> |
|               | 0.33976                     | 0.62058                     | 0.33501                       | (31.15%) Fe <sup>4+</sup> |

## References

- 1 S. Feng, C. Zheng, Z. Song, X. Wu, M. Wu, F. Xu and Z. Wen, *Chem Eng. J.*, 2023, **475**, 146090.
- 2 Q. Shen, X. Zhao, Y. Liu, Y. Li, J. Zhang, N. Zhang, C. Yang and J. Chen, *Adv. Sci.*, 2020, **7**, 2002199.
- 3 Y. Hou, J. Jin, C. Huo, Y. Liu, S. Deng and J. Chen, *Energy Storage Mater.*, 2023, **56**, 87–95.
- 4 Y. Liu, Q. Shen, X. Zhao, J. Zhang, X. Liu, T. Wang, N. Zhang, L. Jiao, J. Chen and L. Fan, *Adv. Funct. Mater.*, 2020, **30**, 1907837.
